# Supplementary material for: Ultrahigh-throughput exfoliation of graphite into pristine ‘single-layer’ graphene using microwaves and molecularly engineered ionic liquids
Source: Springer Nature journal article supplement (doi:10.1038/nchem.2315), 2015-08-10
Supplement: 41557_2015_BFnchem2315_MOESM3_ESM.mol [file 41557_2015_BFnchem2315_MOESM3_ESM.mol]

  ChemDraw07231505212D

 40 39  0  0  0  0  0  0  0  0999 V2000
   -3.9431    0.9325    0.0000 P   0  5  0  0  0  0  0  0  0  0  0  0
   -3.2286    0.5200    0.0000 F   0  0  0  0  0  0  0  0  0  0  0  0
   -3.2286    1.3450    0.0000 F   0  0  0  0  0  0  0  0  0  0  0  0
   -3.9431    1.7575    0.0000 F   0  0  0  0  0  0  0  0  0  0  0  0
   -4.6575    1.3450    0.0000 F   0  0  0  0  0  0  0  0  0  0  0  0
   -4.6575    0.5200    0.0000 F   0  0  0  0  0  0  0  0  0  0  0  0
   -3.9431    0.1075    0.0000 F   0  0  0  0  0  0  0  0  0  0  0  0
    4.2412    1.0789    0.0000 P   0  5  0  0  0  0  0  0  0  0  0  0
    4.9557    0.6664    0.0000 F   0  0  0  0  0  0  0  0  0  0  0  0
    4.9557    1.4914    0.0000 F   0  0  0  0  0  0  0  0  0  0  0  0
    4.2412    1.9039    0.0000 F   0  0  0  0  0  0  0  0  0  0  0  0
    3.5267    1.4914    0.0000 F   0  0  0  0  0  0  0  0  0  0  0  0
    3.5267    0.6664    0.0000 F   0  0  0  0  0  0  0  0  0  0  0  0
    4.2412    0.2539    0.0000 F   0  0  0  0  0  0  0  0  0  0  0  0
   -4.0432   -0.6318    0.0000 C   0  0  0  0  0  0  0  0  0  0  0  0
   -3.3728   -1.1126    0.0000 N   0  0  0  0  0  0  0  0  0  0  0  0
   -3.6228   -1.8988    0.0000 C   0  0  0  0  0  0  0  0  0  0  0  0
   -4.4478   -1.9039    0.0000 C   0  0  0  0  0  0  0  0  0  0  0  0
   -4.7076   -1.1209    0.0000 N   0  3  0  0  0  0  0  0  0  0  0  0
   -2.5898   -0.8528    0.0000 C   0  0  0  0  0  0  0  0  0  0  0  0
   -1.9088   -1.2506    0.0000 C   0  0  0  0  0  0  0  0  0  0  0  0
   -1.1967   -0.8339    0.0000 O   0  0  0  0  0  0  0  0  0  0  0  0
   -0.4799   -1.2423    0.0000 C   0  0  0  0  0  0  0  0  0  0  0  0
    0.2322   -0.8257    0.0000 C   0  0  0  0  0  0  0  0  0  0  0  0
    0.9491   -1.2340    0.0000 O   0  0  0  0  0  0  0  0  0  0  0  0
    1.8641   -0.8193    0.0000 C   0  0  0  0  0  0  0  0  0  0  0  0
    2.4657   -1.2491    0.0000 C   0  0  0  0  0  0  0  0  0  0  0  0
   -5.4938   -0.8708    0.0000 C   0  0  0  0  0  0  0  0  0  0  0  0
   -6.2133   -1.2745    0.0000 C   0  0  0  0  0  0  0  0  0  0  0  0
   -6.9227   -0.8532    0.0000 C   0  0  0  0  0  0  0  0  0  0  0  0
   -7.6421   -1.2569    0.0000 C   0  0  0  0  0  0  0  0  0  0  0  0
    7.6421   -1.2409    0.0000 C   0  0  0  0  0  0  0  0  0  0  0  0
    6.2135   -1.2131    0.0000 C   0  0  0  0  0  0  0  0  0  0  0  0
    5.5072   -0.7867    0.0000 C   0  0  0  0  0  0  0  0  0  0  0  0
    6.9358   -0.8146    0.0000 C   0  0  0  0  0  0  0  0  0  0  0  0
    4.0525   -0.5741    0.0000 C   0  0  0  0  0  0  0  0  0  0  0  0
    3.3909   -1.0670    0.0000 N   0  3  0  0  0  0  0  0  0  0  0  0
    3.6552   -1.8485    0.0000 C   0  0  0  0  0  0  0  0  0  0  0  0
    4.4801   -1.8387    0.0000 C   0  0  0  0  0  0  0  0  0  0  0  0
    4.7257   -1.0510    0.0000 N   0  0  0  0  0  0  0  0  0  0  0  0
  1  2  1  0      
  1  3  1  0      
  1  4  1  0      
  1  5  1  0      
  1  6  1  0      
  1  7  1  0      
  8  9  1  0      
  8 10  1  0      
  8 11  1  0      
  8 12  1  0      
  8 13  1  0      
  8 14  1  0      
 15 16  1  0      
 16 17  1  0      
 17 18  2  0      
 18 19  1  0      
 15 19  2  0      
 20 21  1  0      
 23 24  1  0      
 22 23  1  0      
 26 27  1  0      
 25 26  1  0      
 27 37  1  0      
 24 25  1  0      
 21 22  1  0      
 16 20  1  0      
 28 29  1  0      
 29 30  1  0      
 30 31  1  0      
 19 28  1  0      
 33 34  1  0      
 33 35  1  0      
 32 35  1  0      
 36 37  2  0      
 37 38  1  0      
 38 39  2  0      
 39 40  1  0      
 36 40  1  0      
 34 40  1  0      
M  CHG  4   1  -1   8  -1  19   1  37   1
M  END
